# Supplementary material
Source: publisher figshare collection journal article supplement (https://acs.figshare.com/ndownloader/files/4054489)
Supplement: Supplementary file 1 [file 4054489]

## Supporting Information

### **Facile Preparation of Nickel Phosphide (Ni<sub>12</sub>P<sub>5</sub>) and Synergistic Effect with Intumescent Flame Retardants in Ethylene-Vinyl Acetate Copolymer**

Keqing Zhou,<sup>†</sup> Bibo Wang,<sup>†</sup> Saihua Jiang,<sup>†,‡</sup> Haixia Yuan,<sup>†</sup> Lei Song,<sup>\*,†</sup> and Yuan Hu,<sup>\*,†,‡</sup>

<sup>†</sup>State Key Laboratory of Fire Science, University of Science and Technology of China, 96 Jinzhai Road, Hefei, Anhui 230026, People's Republic of China

<sup>‡</sup>Suzhou Key Laboratory of Urban Public Safety, Suzhou Institute for Advanced Study, University of Science and Technology of China, 166 Ren'ai Road, Suzhou, Jiangsu 215123, People's Republic of China

\* To whom correspondence should be addressed.

Tel.: +86-551-3601664; fax: +86-551-3601664.

E-mail address: yuanhu@ustc.edu.cn (Y. H). leisong@ustc.edu.cn (L.S.).

| Sample | T <sub>-5 wt %</sub> (°C) | T <sub>-50 wt %</sub> (°C) | T <sub>max1</sub> (°C) | T <sub>max2</sub> (°C) | Char residue <sup>a</sup> (%) |
|--------|---------------------------|----------------------------|------------------------|------------------------|-------------------------------|
| 1      | 321                       | 439                        | 348                    | 440                    | 0                             |
| 2      | 300                       | 457                        | 347                    | 451                    | 7.12                          |
| 7      | 314                       | 473                        | 347                    | 478                    | 17.06                         |

<sup>a</sup>At 800 °C

**Table S1.** TGA data of the pure EVA and EVA composites
